# Supplementary material for: 2D polyacrylonitrile brush derived nitrogen-doped carbon nanosheets for high-performance electrocatalysts in oxygen reduction reaction
Source: Royal Society of Chemistry journal article supplement (doi:10.1039/c3py01581e), 2013-12-02
Supplement: c3py01581e.pdf [file c3py01581e.pdf]

## Supplementary Information

### 2D Polyacrylonitrile Brushes Derived Nitrogen-doped Carbon Nanosheets for High-performance Electrocatalyst in Oxygen Reduction Reaction

Cheng'an Cao,<sup>†ab</sup> Xiaodong Zhuang,<sup>†b</sup> Yuezeng Su,<sup>\*a</sup> Yi Zhang,<sup>a</sup> Fan Zhang,<sup>\*b</sup>  
Dongqing Wu,<sup>b</sup> and Xinliang Feng<sup>bc</sup>

---

<sup>†</sup> These two authors contributed equally to this work

a]. Dr. Y. Su, C. Cao and Y. Zhang

School of Aeronautics and Astronautics,

Shanghai Jiao Tong University,

Shanghai 200240, P. R. China

E-mail: yzsu@sjtu.edu.cn

b]. C. Cao, Dr. X. Zhuang, Prof. F. Zhang, Dr. D. Wu and Prof. X. Feng

School of Chemistry and Chemical Engineering,

Shanghai Jiao Tong University,

Shanghai 200240, P. R. China

E-mail: fan-zhang@sjtu.edu.cn

c]. Prof. X. Feng

Max Planck Institute for Polymer Research,

Ackermannweg 10, D-55128 Mainz, Germany

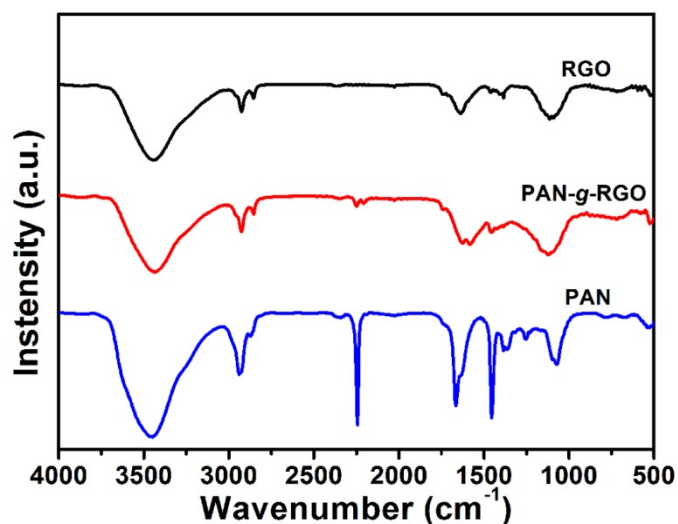

Fig. S1 FT-IR spectra of RGO, PAN-g-RGO, and PAN between 500 and 4000  $\text{cm}^{-1}$ .

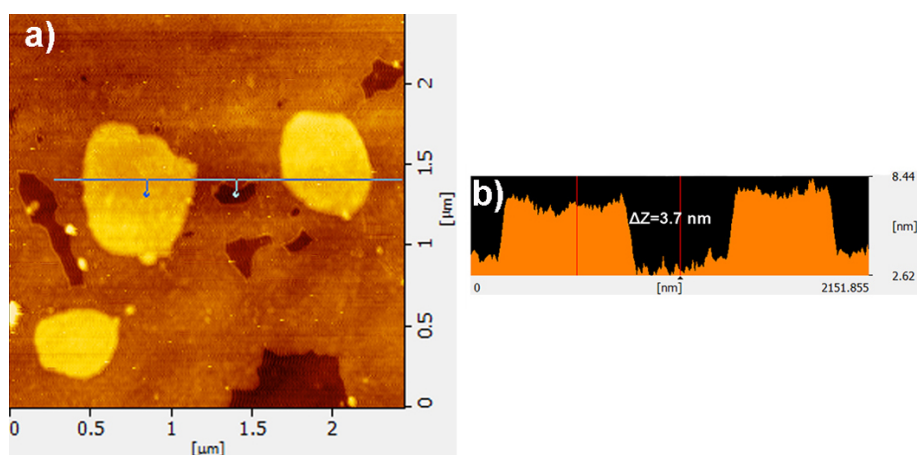

Fig. S2 a) AFM image of NCNS-700/900; b) The cross section image of NCNS-700/900.

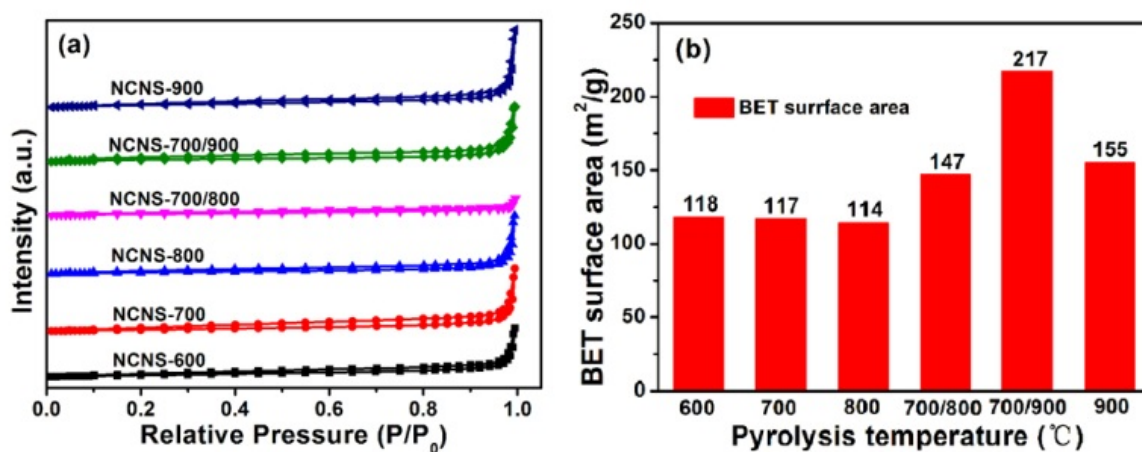

Fig. S3 Nitrogen adsorption and desorption isotherms (a) and BET surface area values (b) for a series of samples pyrolyzed at different temperatures.
